# Supplementary material for: Comparative qualitative phosphoproteomics analysis identifies shared phosphorylation motifs and associated biological processes in evolutionary divergent plants
Source: PubMed Central journal article supplement (PMC5971217; doi:10.1016/j.jprot.2018.04.011), 2018-06-15
Supplement: mmc1.pdf [file mmc1.pdf]

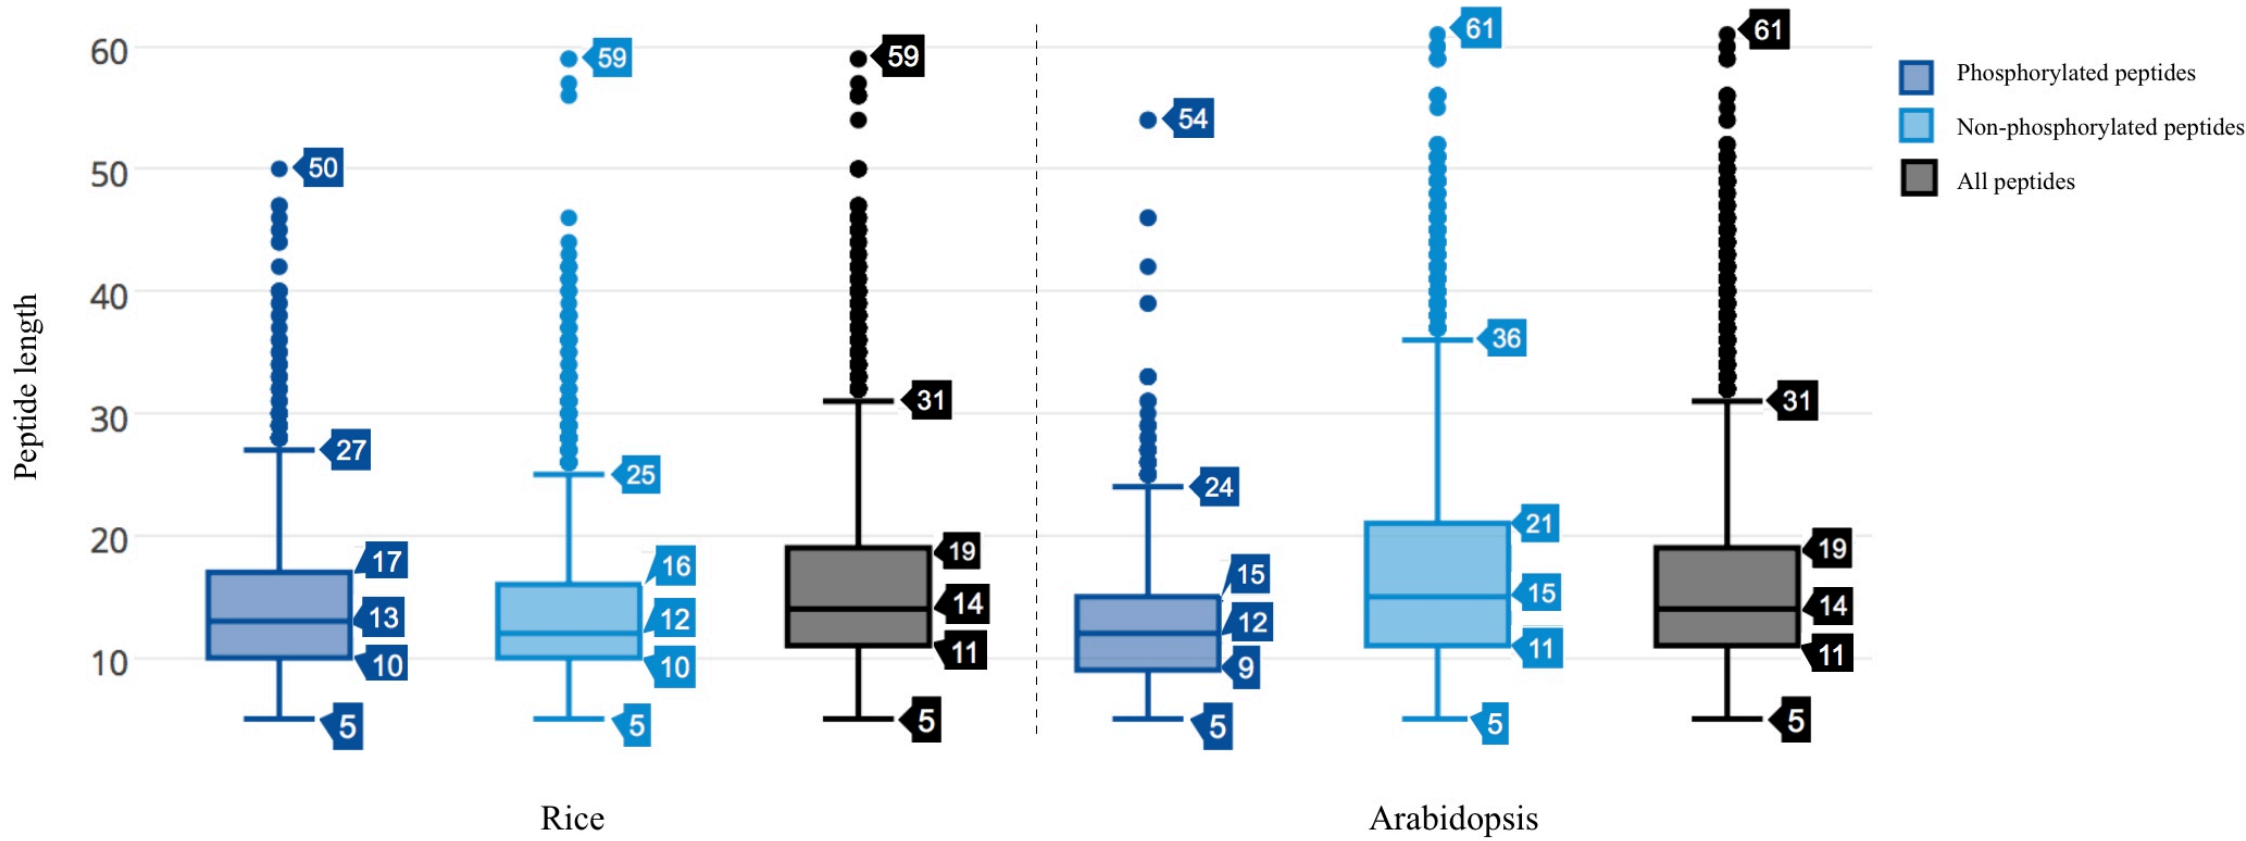

Supplementary Figure 1. The length distribution of phosphorylated, non-phosphorylated and all peptides in rice and *Arabidopsis*.
